# Supplementary material
Source: Springer Nature journal article supplement (https://www.springermedizin.de/resource/supplementary/12879_2011_1933_MOESM3_ESM.pdf/9443284)
Supplement: MOESM3 [file 9443284]

## Appendix: Search terms for VZV-related medication

| APPENDIX C: Search Terms for VZV-related medication |          |                                                                     |
|-----------------------------------------------------|----------|---------------------------------------------------------------------|
| Medication group                                    | ATC code | Definition                                                          |
| Anaesthetics                                        | N01      | Anaesthetics                                                        |
| Analgetics                                          | N02      | Analgetics                                                          |
| Antivirals (local)                                  | D06BB    | Antivirals (dermatological use)                                     |
|                                                     | S01A     | Ophthalmologicals (antiviral)                                       |
|                                                     | S02A     | Otologicals (antiviral)                                             |
| Antivirals (systemic)                               | J05      | Antivirals for systemic use                                         |
| Antibacterials (local)                              | D06A     | Antibiotics for topical use (dermatological use)                    |
|                                                     | D06C     | Antibiotics and chemotherapeutics. combinations(dermatological use) |
|                                                     | S01B     | Ophthalmologicals (antibacterial)                                   |
|                                                     | S02A     | Otologicals( antibacterial)                                         |
| Antibacterials (systemic)                           | J01      | Antibacterials for systemic use                                     |
|                                                     | J04      | Antimycobacterial                                                   |
| Corticosteroids                                     | D07      | Corticosteroids. dermatological preparations                        |
| Antipruritics and emollientia                       | D04      | Antipruritics. including antihistamines., anesthetics. etc          |
|                                                     | D02A     | Emollientia en protectiva                                           |
| Immunoglobulins                                     | J06      | Immune sera and immunoglobulins ( VZV-related)                      |
| Vaccines                                            | J07B     | Vaccines (VZV-related)                                              |
